# Supplementary material for: Religion and the public ethics of stem-cell research: Attitudes in Europe, Canada and the United States
Source: PLoS One. 2017 Apr 20;12(4):e0176274. doi: 10.1371/journal.pone.0176274 (PMC5398703; doi:10.1371/journal.pone.0176274)
Supplement: S1 File — Stata do-file containing code used to run models. (DO) [file pone.0176274.s001.do]

use stemcelldata.dta

eststo clear
//Country differences in stem cell approval
eststo: reg stem_mean US CAN


eststo: reg stem_mean US CAN religctrd


//add religiosity and religion x area(4 levels)
eststo: reg stem_mean US CAN religctrd religxus religxcan


//add demographics
eststo: reg stem_mean US CAN religctrd religxus religxcan ///
female i.age6cats ed1619 ed20plus edstudy eddk  


//add morality
eststo: reg stem_mean US CAN religctrd religxus religxcan ///
female i.age6cats ed1619 ed20plus edstudy eddk morctrd


//add morality x area
eststo: reg stem_mean US CAN religctrd religxus religxcan ///
female i.age6cats ed1619 ed20plus edstudy eddk morctrd ///
morxus morxcan


//add benefits
eststo: reg stem_mean US CAN religctrd religxus religxcan ///
female i.age6cats ed1619 ed20plus edstudy eddk benctrd


//add benefits x area
eststo: reg stem_mean US CAN religctrd religxus religxcan ///
female i.age6cats ed1619 ed20plus edstudy eddk benctrd ///
benxus benxcan


//add benefits and morals x area
eststo: reg stem_mean US CAN religctrd religxus religxcan ///
female i.age6cats ed1619 ed20plus edstudy eddk morctrd benctrd ///
morxus morxcan benxus benxcan


generate sample = e(sample)
drop if sample==0

//run models again with analytic sample
eststo clear
//Country differences in stem cell approval
eststo: reg stem_mean US CAN


eststo: reg stem_mean US CAN religctrd


//add religiosity and religion x area(4 levels)
eststo: reg stem_mean US CAN religctrd religxus religxcan


//add demographics
eststo: reg stem_mean US CAN religctrd religxus religxcan ///
female i.age6cats ed1619 ed20plus edstudy eddk  


//add morality
eststo: reg stem_mean US CAN religctrd religxus religxcan ///
female i.age6cats ed1619 ed20plus edstudy eddk morctrd


//add morality x area
eststo: reg stem_mean US CAN religctrd religxus religxcan ///
female i.age6cats ed1619 ed20plus edstudy eddk morctrd ///
morxus morxcan


//add benefits
eststo: reg stem_mean US CAN religctrd religxus religxcan ///
female i.age6cats ed1619 ed20plus edstudy eddk benctrd


//add benefits x area
eststo: reg stem_mean US CAN religctrd religxus religxcan ///
female i.age6cats ed1619 ed20plus edstudy eddk benctrd ///
benxus benxcan


//add benefits and morals x area
eststo: reg stem_mean US CAN religctrd religxus religxcan ///
female i.age6cats ed1619 ed20plus edstudy eddk morctrd benctrd ///
morxus morxcan benxus benxcan
  
//create regression table
esttab using regressiontable.rtf, b(2) r2 nocons compress
