# Supplementary material for: Religion and the public ethics of stem-cell research: Attitudes in Europe, Canada and the United States
Source: PLoS One. 2017 Apr 20;12(4):e0176274. doi: 10.1371/journal.pone.0176274 (PMC5398703; doi:10.1371/journal.pone.0176274)
Supplement: S2 File — Excel file containing results of robustness check. (XLSX) [file pone.0176274.s002.xlsx]

## Sheet: Sheet1
			US	CAN	slovenija	ceska republika	sverige	luxembourg	great britain	nederland	belgique	lietuva	danmark	malta	ireland	espana	suomi	latvia	polska	ellada	magyarorszag	italia	france	eesti	portugal	kypros	lovenska republic	deutschland ost	deutschland west	_sterreich	northern ireland
	religctrd		-0.0377047	-0.0508256	0.0262391	-0.0437452	-0.0003702	0.0221185	0.0101809	-0.0783694	-0.014664	0.0159984	0.050547	0.0354603	-0.0565986	-0.0951211	-0.0600974	-0.103555	-0.010003	-0.0136762	-0.0235609	-0.0945905	0.0275893	-0.0176491	-0.0837011	-0.043929	-0.0737909	-0.0702182	-0.0612137	-0.0039368	-0.170153
	female		-0.076978	0.0087212	-0.0210551	-0.0292288	-0.113925	-0.11823	-0.0551604	-0.0710755	-0.0455683	-0.119316	-0.263539	0.067107	-0.141474	0.107094	-0.048852	0.0951124	0.0796105	0.0374271	0.0472424	0.0814588	-0.112974	-0.135391	0.0163535	-0.0090002	-0.0492478	0.0559089	0.0667014	0.0144186	0.15849
	age6cats
	25-34		0.216836	-0.181549	-0.334188	-0.0373504	-0.0333633	-0.320865	-0.343038	-0.0611607	-0.0476085	0.0867102	-0.0970648	-0.245701	0.0361658	0.261109	-0.114797	0.246999	0.0721337	-0.240205	0.407193	-0.0648854	0.0444816	0.25362	-0.0287026	-0.741505	-0.0551608	-0.119395	0.161514	-0.008387	-0.194608
	35-44		0.202699	-0.187439	-0.171718	0.0850243	-0.023504	-0.270356	-0.317839	-0.178541	-0.109865	0.130215	0.0733255	-0.187028	-0.185683	0.107312	0.173799	0.259716	0.0307349	-0.318373	0.241105	-0.0551824	0.124434	0.216073	0.0044929	-0.347871	-0.124375	-0.0862432	0.0809773	0.131769	-0.343861
	45-54		0.18246	-0.218524	-0.391425	0.0640023	-0.0493674	-0.0797895	-0.48865	-0.326665	-0.118132	0.170993	-0.0752919	0.0215594	-0.007274	0.233245	-0.0928847	0.322886	0.0045599	-0.171873	0.195574	-0.189598	0.112607	0.140421	0.231517	-0.52017	-0.15032	-0.216739	0.0602772	-0.0412203	-0.0073926
	55-64		0.120601	-0.191514	-0.334322	0.0731377	-0.145215	-0.169088	-0.603395	-0.405195	-0.107648	0.0116392	-0.195808	-0.0558308	0.204226	0.145311	-0.247888	0.113432	-0.0063969	-0.104592	0.1091	-0.305251	0.0197789	0.0405639	-0.0416428	-0.341153	-0.145545	-0.164193	0.120447	-0.1171	-0.0941098
	65+		0.16355	-0.291928	-0.302661	-0.040915	-0.0958831	-0.0017041	-0.664757	-0.251604	-0.166656	0.22133	0.106438	-0.11839	-0.110023	0.109873	-0.187191	0.178098	-0.0882988	-0.0468412	0.234896	-0.237433	-0.0171168	0.267126	0.0565782	-0.277917	-0.196869	-0.288781	-0.0373091	-0.0293274	-0.0957106
	ed1619		0.0946861	0.162916	0.190548	0.0483148	-0.0106736	0.213646	-0.159154	0.056715	-0.0247733	-0.225548	0.0967668	0.120057	-0.0542515	0.071622	0.0245825	0.0513705	0.446583	0.0537823	-0.0624486	-0.117131	-0.0756936	-0.0643134	0.240199	-0.0192742	0.0736944	-0.0643824	0.0574288	0.161414	0.231383
	ed20plus		0.206576	0.273261	0.24498	0.0190703	0.0276155	0.310016	-0.122458	0.0498511	-0.0009828	-0.0741558	0.0646438	-0.0528435	-0.0453289	0.0985662	0.14343	0.117068	0.498375	0.0757027	0.0413837	-0.12875	0.0857962	-0.0740859	0.210355	-0.0054279	-0.0390518	0.0988292	0.211381	0.2398	0.727572
	edstudy		0.458797	0.0186984	0.0376121	0.0873703	0.112455	0.453788	-0.305804	-0.180287	-0.162064	0.0389758	0.13424	0.120401	-0.0971456	0.228374	0.0821449	0.332116	0.734312	-0.0483243	0.223546	-0.202548	0.16723	0.206744	0.246201	-0.35857	0.0023664	-0.233352	0.106417	0.303227	0.456882
	eddk		0	0	-0.224559	-0.0661867	0	0	0.0842634	0	-0.544657	0.158165	-0.181119	0	0.828468	0.373488	-0.129679	0	0.648627	0	0	0.0561475	-0.944064	-0.280531	0.140946	0	-0.111161	0	0	0.0657551	0
	morctrd		0.298618	0.252673	0.141873	0.139037	0.174849	0.171348	0.203478	0.0794788	0.0620879	0.132103	0.150082	0.179031	0.198856	0.173773	0.118397	0.174942	0.156427	0.174988	0.0538387	-0.0687309	0.0893027	0.101444	0.0566243	0.0816001	0.101479	0.13558	0.156039	0.0914363	0.0160795
	benctrd		0.278809	0.233181	0.45298	0.451398	0.494638	0.512915	0.559196	0.440888	0.460568	0.53102	0.557654	0.590754	0.615504	0.593072	0.542549	0.612395	0.607599	0.63107	0.510153	0.396429	0.564569	0.589654	0.556321	0.592232	0.653537	0.700503	0.769012	0.736169	0.801179
			-0.0198083	-0.0194921	0.311107	0.312361	0.319789	0.341568	0.355718	0.361409	0.39848	0.398916	0.407572	0.411723	0.416647	0.419299	0.424152	0.437453	0.451172	0.456082	0.456314	0.46516	0.475266	0.48821	0.499697	0.510632	0.552058	0.564923	0.612973	0.644733	0.785099
